## Index rerum ad vol. 17

Confecit WILHELM BAUMANN, Zürich

- Acid phosphatase in periurethral glandular adenomas, 154
- Adrenogenital syndrome, surgery of the adrenals, 51
- Angionephrography in renal tuberculosis, 106
- Anorchie, Anorchidism, Anorquidia, 343
- Aplasia of the ductus deferens, 164
- Apsrmie, urologische Abklärung, 164
- Bladder, calculi in rats, 34
- , reconstruction, 14
- , results of conservative surgery for cancer, 193
- Calyx minimus, 257
- Canal déférent, aplasia bilatérale, 164
- Cancer expérimentale de la prostate, 223
- Cancer of the urogenital tract, urinary lactic dehydrogenase activity, 65
- Cancer prostatique, un nouveau composé d'inhibition hypophysaire, 129
- Carcinoma prostático, etiología, 349
- –, un preparado inhibidor de la pituitaria, 129
- Chyluria in Japan, 241
- Conducto deferent, aplasia bilateral, 164
- Criptorquidia experimental en ratones, 146
- Cryptorchidie expérimentale chez le rat, 146
- Cushing syndrome, surgery of the adrenals, 51
- Déhydrogénase lactique de l'urine, 65
- Ductus deferens, aplasia bilateralis, 164
- Entero-revascularization of the kidney, 1
- Fosfatasas del adenoma de las glándulas periuretrales, 154
- Glandes surrénales, chirurgie, 51
- Glándulas periuretrales, adenoma, 154
- Harnblase, Behandlung der malignen Geschwülste, 193
- , Ergebnisse der konservativ-chirurgischen Behandlung der malignen Geschwülste, 193
- , plastische Erweiterung, 14
- , Steinerzeugung bei Ratten, 34
- Harnröhre, Behandlung der posttraumatischen Strikturen, 364
- , Wiederherstellung eines Abrisses von der Prostata, 364
- Hirsutismus, chirurgia glandulae suprarenalis, 51
- Hyperparathyroidisme expérimental, études histologiques et histochimiques du rein, 294
- Hypertension, entero-revascularization of the kidney, 1
- Infections urinaires, traitement par le lactobacille acidophile, 183
- Kidney, angiophrography in tuberculosis, 106
- , calyx minimus, 257
- , entero-revascularization in hypertension, 1
- , excretion of tryptophan metabolites in tumours, 175
- , function before and after chemotherapy, 93
- , function in urogenital tuberculosis, 93
- roentgenological findings and clearance functions in tuberculosis, 106
- , studies in experimentally induced hyperparathyroidism, 294
- , supernumerary, 265
- Kryptorchismus, experimenteller, 146
- Lactatdehydrogenase-Aktivität im Urin, 65
- Lactobacillus acidophilus, treatment of urologic infections, 183
- Lithiase urinaire, facteurs étiologiques biochimiques, 230
- Mucoides in la orina, 324
- Mucoprotein, harnspezifisches, 324
- Nebennieren, Chirurgie, 51
- Nephrogenous hypertension, entero-revascularization, 1
- Niere, Ausscheidung von Tryptophan-Metaboliten bei Nierenbeckentumoren, 175
- , Entero-Revascularisation bei Hypertonie, 1
- , Funktion vor und nach Chemotherapie, 93
- , Röntgenbefunde und Clearance-Werte bei Nierentuberculose, 106

- , Studien bei experimentellem Hyperparathyreoidismus, 294
- , überzählige, 265
- Periutthal glandular adenomas, 154
- Pheochromocitomas, surgery of the adrenals, 51
- Phosphatase in Adenomen periurethraler Drüsen, 154
- Prostata, Aethiopathologie des Carcinoms, 349
- , Katheter zur Sekretanalyse, 321
- , Wiederherstellung des Abrisses der Harnröhre, 364
- Prostatic cancer, a new pituitary-inhibiting compound, 129
- , etiopathology, 349
- , experimental, 223
- Prostatic secretion, catheter for analysis, 321
- Prostatitis, treatment with lactobacillus acidophilus, 183
- Pyelitis, treatment with lactobacillus acidophilus, 183
- Pyelonephritis, revascularisation renalis, 1
- Pyelonephritis chronica, treatment with lactobacillus acidophilus, 183
- Rein, calyx minimus, 257
- , études dans l'hyperparathyroïdisme expérimental, 294
- , excretion des métabolites de tryptophane, 175
- , fonction avant et après chimiothérapie, 93
- , surnuméraire, 265
- , résultats radiologiques et clearances dans la tuberculose, 106
- , revascularisation entérale, 1
- Renal pelvis tumours, excretion of tryptophan metabolites, 175
- Renal tuberculosis, roentgenological findings and clearance functions, 106
- Retentio testis experimentalis, 146
- Revascularisation entérale du rein, 1
- Riñón, estudio en el hiperparatiroidismo provocado experimentalmente, 294
- , función en la tuberculosis, 93
- , la revascularización entérica, 1
- , supernumerario, 265
- Samenblase Katheter zur Sekretanalyse 321
- , der Ratte, hormonelle Abhängigkeit, 84
- Seminal vesicle secretion, catheter for analysis, 321
- , tissue, endocrine dependence, 84
- Sialic acid, 324
- Sperm, catheter for analysis, 321
- Spermiogramme pathologique, examens urologiques, 164
- Suprarenales, cirugía, 51
- Teflon in vesical reconstruction, 14
- Tuberculose urogénitale, fonction rénale, 93
- , résultats radiologiques et clearances, 106
- Tryptophan metabolites, excretion in renal pelvis tumours, 175
- Urethra, treatment of an avulsed prostate, 364
- Urethral stricture, plastic surgery, 115, 364
- Uréthroplastie pour sténoses, 115, 364
- Urogenital tuberculosis, renal function, 93, 106
- Urolithiasis, biochemical factors in the etiology 230, 324
- , in rats, 34
- Uromucoid in normal and stone urine, 324
- Urosepsis, treatment with lactobacillus acidophilus, 183
- Vejiga, ampicación plástica, 14
- , calyx minimus, 257
- , formación de cálculos en la rata, 34
- , resultado del tratamiento quirúrgico conservador de los tumores malignos, 193
- , tratamiento de los tumores malignos, 193
- Vésicules séminales du rat en culture tissulaire, 84
- Vessie, agrandissement plastique, 14
- , formation de calculs chez le rat, 34
- , résultats du traitement chirurgical conservateur des tumeurs malignes, 193
- , traitement chirurgical des tumeurs malignes, 193
- Virilismus, chirurgia glandulae suprarenalis, 51
- Young's operation, 51
